# Supplementary material for: Adsorptive desulfurization of dibenzothiophene over lignin-derived biochar by one-step modification with potassium hydrogen phthalate
Source: Royal Society of Chemistry journal article supplement (doi:10.1039/c6ra20220a), 2016-01-01
Supplement: c6ra20220a1.pdf [file c6ra20220a1.pdf]

## Supporting Information

### **Adsorptive desulfurization of dibenzothiophene over lignin-derived biochar by one-step modification of potassium hydrogen phthalate**

*Jing-jing Li, <sup>a</sup> Hao Zhang, <sup>a, b</sup> Xiao-dong Tang, <sup>\*, a, b</sup>, Hai Lu, <sup>a, b</sup>*

<sup>a</sup> College of Chemistry and Chemical Engineering, Southwest Petroleum University, Chengdu, 610500, P. R. China

<sup>b</sup> State Key Laboratory of Oil and Gas Reservoir Geology and Exploitation, Southwest Petroleum University, Chengdu, 610500, P. R. China

\* Corresponding Author

Tel: (+86)-28-83033079. Fax: (+86)-28-83033079. E-mail: [txda429@163.com](mailto:txda429@163.com).

Table S1 The pH values of dissolved samples in aqueous solutions

| Dissolved samples      | pH values of solution <sup>a</sup> |
|------------------------|------------------------------------|
| 0.5g Lignin            | 8.8                                |
| 0.5g KHP               | 4.3                                |
| 0.5g Lignin + 0.5g KHP | 6.4                                |
| 0.5g Lignin + 1.0g KHP | 5.2                                |
| 0.5g Lignin + 1.5g KHP | 4.9                                |

<sup>a</sup>The measurement tests are carried out at ambient temperature.

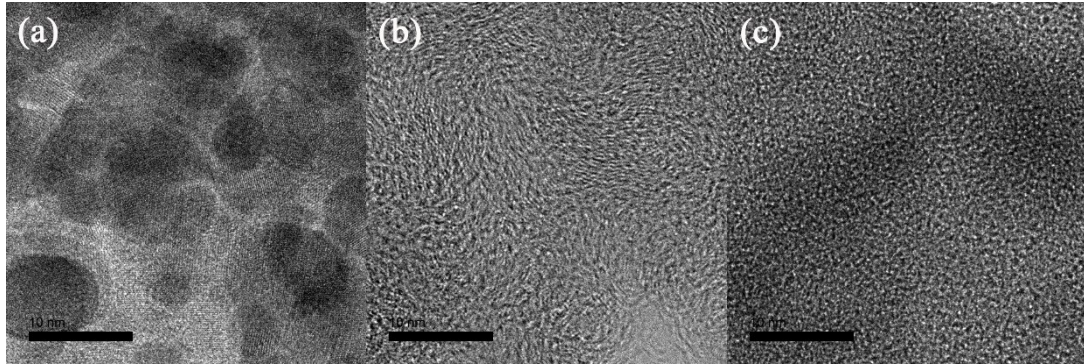

Fig.S1 The TEM images of (a) KHP-char (b) lignin-char (c) KHP-activated char with mass ratio of 1:1

Table S2 The char yield and desulfurization rate of the main component

| Char samples            | Char yield <sup>a</sup> | ADS samples                              | Desulfurization rate <sup>b</sup> |
|-------------------------|-------------------------|------------------------------------------|-----------------------------------|
| 15g Lignin              | 56.8wt%                 | 0.1g pure lignin-char + 10ml DBT         | 44.7%                             |
| 15g KHP                 | 11.4wt%                 | 0.1g KHP-char + 10ml DBT                 | 9.2%                              |
| 15g Lignin<br>+ 15g KHP | 35.1wt%                 | 0.1g activated lignin-char + 10ml<br>DBT | 92.5%                             |

<sup>a</sup> Preparation condition: T=800°C, t=1h.

<sup>b</sup> ADS condition: T=30°C, t=4h.

Table S3 Content of acid functional groups on the surface of regenerated biochar

| Reused times                               | 1 <sup>st</sup> biochar | 2 <sup>nd</sup> biochar | 3 <sup>rd</sup> biochar | 4 <sup>th</sup> biochar | 5 <sup>th</sup> biochar |
|--------------------------------------------|-------------------------|-------------------------|-------------------------|-------------------------|-------------------------|
| Surface acidity<br>(mmol·g <sup>-1</sup> ) | 1.0667                  | 0.9824                  | 0.9749                  | 0.9702                  | 0.9689                  |
